# Supplementary material for: Captive-reared European hamsters follow an offensive strategy during risk-assessment
Source: PLoS One. 2019 Jan 14;14(1):e0210158. doi: 10.1371/journal.pone.0210158 (PMC6331116; doi:10.1371/journal.pone.0210158)
Supplement: S1 Table — (XLSX) [file pone.0210158.s001.xlsx]

## Sheet: Y-maze test
ID	Scent	Order_test	Period	Visits_total_duration	No_body_shaking	Sex	No_visits
12.328.2	Predator	Test 1	morning	115.35	0	M	5
12.328.2	Herbivorous	Test 1	morning	110.22	0	M	5
12.334.2	Predator	Test 1	morning	74.03	0	M	4
12.334.2	Herbivorous	Test 1	morning	126.76	0	M	5
12.330.2	Predator	Test 1	morning	126.59	0	M	5
12.330.2	Herbivorous	Test 1	morning	104.56	0	M	5
12.306.3	Predator	Test 1	morning	131.66	0	F	6
12.306.3	Herbivorous	Test 1	morning	80.6	0	F	6
12.317.6	Predator	Test 1	afternoon	89.08	1	F	4
12.317.6	Herbivorous	Test 1	afternoon	82.32	0	F	3
12.316.5	Predator	Test 1	afternoon	93.09	1	F	4
12.316.5	Herbivorous	Test 1	afternoon	98.63	1	F	4
12.299.4	Predator	Test 1	afternoon	47.44	2	F	3
12.299.4	Herbivorous	Test 1	afternoon	117.54	2	F	4
12.333.2	Predator	Test 1	afternoon	107.13	0	M	3
12.333.2	Herbivorous	Test 1	afternoon	59.09	0	M	5
12.331.2	Predator	Test 1	afternoon	121.29	0	M	5
12.331.2	Herbivorous	Test 1	afternoon	61.87	0	M	2
12.328.2	Predator	Test 2	afternoon	92	0	M	5
12.328.2	Herbivorous	Test 2	afternoon	107.23	0	M	5
12.334.2	Predator	Test 2	afternoon	43.36	0	M	5
12.334.2	Herbivorous	Test 2	afternoon	139.62	0	M	8
12.330.2	Predator	Test 2	afternoon	125.13	0	M	6
12.330.2	Herbivorous	Test 2	afternoon	50.13	0	M	4
12.306.3	Predator	Test 2	afternoon	190.69	1	F	4
12.306.3	Herbivorous	Test 2	afternoon	24.81	0	F	3
12.317.6	Predator	Test 2				F
12.317.6	Herbivorous	Test 2				F
12.316.5	Predator	Test 2	morning	66.37	0	F	4
12.316.5	Herbivorous	Test 2	morning	132.41	0	F	5
12.299.4	Predator	Test 2	morning	107.61	1	F	4
12.299.4	Herbivorous	Test 2	morning	63.85	0	F	4
12.333.2	Predator	Test 2	morning	39.47	0	M	4
12.333.2	Herbivorous	Test 2	morning	61.25	0	M	3
12.331.2	Predator	Test 2	morning	115.72	0	M	4
12.331.2	Herbivorous	Test 2	morning	113.2	0	M	4
12.328.2	Predator	Test 3	morning	105.95	0	M	5
12.328.2	Herbivorous	Test 3	morning	74.28	0	M	6
12.334.2	Predator	Test 3	afternoon	86.93	0	M	5
12.334.2	Herbivorous	Test 3	afternoon	91.43	0	M	6
12.330.2	Predator	Test 3	morning	119.4	0	M	3
12.330.2	Herbivorous	Test 3	morning	69.44	0	M	4
12.306.3	Predator	Test 3	afternoon	106	0	F	3
12.306.3	Herbivorous	Test 3	afternoon	93.41	1	F	4
12.317.6	Predator	Test 3				F
12.317.6	Herbivorous	Test 3				F
12.316.5	Predator	Test 3	afternoon	48.78	1	F	7
12.316.5	Herbivorous	Test 3	afternoon	115.26	0	F	4
12.299.4	Predator	Test 3	morning	134.72	1	F	4
12.299.4	Herbivorous	Test 3	morning	33	0	F	2
12.333.2	Predator	Test 3	morning	156.36	0	M	5
12.333.2	Herbivorous	Test 3	morning	58.23	0	M	4
12.331.2	Predator	Test 3	morning	58.9	0	M	3
12.331.2	Herbivorous	Test 3	morning	124.46	0	M	5
12.328.2	Predator	Test 4	afternoon	77.16	0	M	3
12.328.2	Herbivorous	Test 4	afternoon	124.02	0	M	6
12.334.2	Predator	Test 4	morning	58.97	0	M	5
12.334.2	Herbivorous	Test 4	morning	91.79	1	M	6
12.330.2	Predator	Test 4	afternoon	108.57	1	M	4
12.330.2	Herbivorous	Test 4	afternoon	86.7	1	M	5
12.306.3	Predator	Test 4	morning	190.44	1	F	2
12.306.3	Herbivorous	Test 4	morning	62.29	0	F	2
12.317.6	Predator	Test 4	afternoon	67.1	0	F	4
12.317.6	Herbivorous	Test 4	afternoon	46.15	0	F	3
12.316.5	Predator	Test 4	morning	126.04	5	F	7
12.316.5	Herbivorous	Test 4	morning	66.56	0	F	4
12.299.4	Predator	Test 4				F
12.299.4	Herbivorous	Test 4				F
12.333.2	Predator	Test 4	afternoon	75.53	0	M	3
12.333.2	Herbivorous	Test 4	afternoon	62.12	0	M	4
12.331.2	Predator	Test 4	afternoon	118.63	0	M	3
12.331.2	Herbivorous	Test 4	afternoon	59.66	0	M	2
