# Supplementary material for: Captive-reared European hamsters follow an offensive strategy during risk-assessment
Source: PLoS One. 2019 Jan 14;14(1):e0210158. doi: 10.1371/journal.pone.0210158 (PMC6331116; doi:10.1371/journal.pone.0210158)
Supplement: S3 Table — (XLSX) [file pone.0210158.s003.xlsx]

## Sheet: Experiment with mobile ferret
Hamster	Sex	Date	Session	FerOrd	Ferret	VidPre	ObsPre	TimCorPre	TimMidPre	TimTubPre	TimTotPre	EntTubPre	DisTubPre	DisTubPreCm	DisEntPre	DisEntPreCm	InsTubPre	VidTre	Attack	Tube	ContactH	VidPos	ObsPos	TimCorPos	TimMidPos	TimTubPos	TimTotPos	EntTubPos	DisTubPos	DisTubPosCm	DisEntPos	DisEntPosCm	InsTubPos	TimCorDif	TimMidDif	TimTubDif	DisTubDif	DisTubDifCm	DisEntDif	DisEntDifCm	EntTubDif	InsTubDif	EatPre	EatTre	EatPos	EatDif	EatNumPre	EatNumPos	EatNumDif
14.161.6	Male	2016-05-25	One	First	Yes	92	CB	295.443	304.515	0	599.958	0	0	0	0	0	1	42	0	0	4	74	CB	329.918	232.937	37.084	599.939	7	12	480	1.71429	68.5714	4	34.475	-71.578	37.084	12	480	1.71429	68.5714	7	3	12	12	39	27	2	9	7
14.162.12	Female	2016-05-20	One	First	Yes	39	JF	333.084	239.297	25.755	598.136	4	8	340	2	85	1	59	6	2	3	91	CB	356.961	195.98	46.986	599.927	6	25	1010	4.16667	168.333	11	23.877	-43.317	21.231	17	670	2.16667	83.3333	2	10	19	3	8	-11	5	0	-5
14.414.7	Female	2016-05-20	One	First	Yes	24	JF	286.332	276.968	36.62	599.92	7	10	350	1.42857	50	4	62	4	0	0	60	JF	315.235	248.92	35.733	599.888	8	14	640	1.75	80	0	28.903	-28.048	-0.887	4	290	0.321429	30	1	-4	27	9	0	-27	6	0	-6
14.516.5	Female	2016-05-25	One	First	Yes	55	JF	343.466	223.267	33.21	599.943	5	5	190	1	38	4	98	7	0	3	17	JF	280.1	284.718	35.094	599.912	12	17	670	1.41667	55.8333	5	-63.366	61.451	1.884	12	480	0.416667	17.8333	7	1	21	9	10	-11	2	1	-1
14.731.7	Male	2016-05-20	One	First	Yes	63	JF	343.043	237.711	19.172	599.926	2	5	190	2.5	95	6	61	5	0	0	37	JF	284.038	283.528	32.348	599.914	3	10	380	3.33333	126.667	5	-59.005	45.817	13.176	5	190	0.833333	31.6667	1	-1	40	29	18	-22	3	0	-3
14.732.10	Female	2016-05-24	One	First	Yes	96	CB	242.109	334.407	23.357	599.873	5	9	390	1.8	78	15	67	0	1	1	71	CB	215.705	339.389	44.763	599.857	11	33	1380	3.3	125.455	0	-26.404	4.982	21.406	24	990	1.5	47.4545	6	-15	0	1	40	40	5	4	-1
14.732.18	Female	2016-05-24	One	First	Yes	45	JF	302.771	268.692	28.451	599.914	8	9	360	1.125	45	4	50	5	8	2	32	JF	377.175	183.975	38.751	599.901	13	32	1390	2.66667	106.923	0	74.404	-84.717	10.3	23	1030	1.54167	61.9231	5	-4	35	36	25	-10	2	5	3
14.732.8	Male	2016-05-24	One	First	Yes	30	JF	293.976	299.944	6.004	599.924	1	1	50	1	50	5	82	4	0	2	78	CB	276.813	304.324	18.76	599.897	3	5	190	1.66667	63.3333	7	-17.163	4.38	12.756	4	140	0.666667	13.3333	2	2	39	40	37	-2	0	5	5
14.161.12	Male	2016-05-26	Two	Second	Yes	41	JF	356.743	229.639	13.556	599.938	1	4	170	4	170	8	23	0	0	2	66	CB	231.877	355.785	12.229	599.891	3	7	290	2.33333	96.6667	6	-124.866	126.146	-1.327	3	120	-1.66667	-73.3333	2	-2	40	33	4	-36	4	2	-2
14.256.10	Male	2016-05-26	Two	Second	Yes	44	JF	357.379	238.427	4.138	599.944	1	1	50	1	50	3	28	0	0	10	53	JF	299.339	272.214	28.378	599.931	1	6	240	6	240	2	-58.04	33.787	24.24	5	190	5	190	0	-1	3	0	0	-3	3	1	-2
14.256.7	Male	2016-05-26	Two	Second	Yes	29	JF	373.4	224.776	1.768	599.944	1	1	20	1	20	4	4	1	0	5	10	JF	282.638	305.284	11.979	599.901	4	3	120	1	30	8	-90.762	80.508	10.211	2	100	0	10	3	4	40	20	36	-4	9	2	-7
14.413.8	Female	2016-06-01	Two	Second	Yes	95	CB	262.626	314.956	22.304	599.886	6	12	570	2	95	13	33	0	0	1	13	JF	171.773	405.455	22.71	599.938	7	7	290	1.16667	41.4286	10	-90.853	90.499	0.406	-5	-280	-0.833333	-53.5714	1	-3	38	15	7	-31	11	4	-7
14.415.7	Female	2016-06-01	Two	Second	Yes	19	JF	323.428	258.968	17.499	599.895	6	11	430	1.83333	71.6667	3	35	5	0	10	87	CB	248.189	328.744	22.976	599.909	7	13	590	1.85714	84.2857	3	-75.239	69.776	5.477	2	160	0.0238095	12.619	1	0	6	4	2	-4	3	1	-2
14.421.4	Female	2016-05-26	Two	Second	Yes	36	JF	341.086	218.163	40.673	599.922	6	18	750	3	125	1	14	10	0	9	85	CB	315.792	250.584	33.545	599.921	8	12	420	1.5	52.5	5	-25.294	32.421	-7.128	-6	-330	-1.5	-72.5	2	4	19	3	26	7	6	4	-2
14.731.8	Female	2016-05-26	Two	Second	Yes	15	JF	337.377	219.033	43.523	599.933	6	21	870	3.5	145	4	3	5	4	0	81	CB	436.462	145.861	17.616	599.939	4	13	560	3.25	140	5	99.085	-73.172	-25.907	-8	-310	-0.25	-5	-2	1	17	2	40	23	3	5	2
14.732.16	Female	2016-06-01	Two	Second	Yes	80	CB	248.976	310.507	40.442	599.925	9	22	890	2.44444	98.8889	5	21	8	0	3	16	JF	342.798	248.465	8.644	599.907	4	8	340	2	85	1	93.822	-62.042	-31.798	-14	-550	-0.444444	-13.8889	-5	-4	40	17	38	-2	13	1	-12
14.161.6	Male	2016-06-01	Two	First	No	97	CB	401.28	195.235	3.457	599.972	2	2	40	1	20	7	22	NA	0	NA	99	CB	372.001	200.533	27.408	599.942	2	9	390	4.5	195	7	-29.279	5.298	23.951	7	350	3.5	175	0	0	10	29	39	29	3	5	2
14.162.12	Female	2016-05-27	Two	First	No	64	JF	342.023	224.8	33.112	599.935	7	18	720	2.57143	102.857	3	9	NA	2	NA	76	CB	370.861	225.964	3.119	599.944	1	3	120	3	120	0	28.838	1.164	-29.993	-15	-600	0.428571	17.1429	-6	-3	24	33	24	0	5	7	2
14.414.7	Female	2016-05-27	Two	First	No	73	CB	323.919	221.467	54.526	599.912	11	42	1740	3.81818	158.182	3	65	NA	6	NA	75	CB	360.61	211.216	28.071	599.897	7	12	540	1.71429	77.1429	0	36.691	-10.251	-26.455	-30	-1200	-2.1039	-81.039	-4	-3	6	3	0	-6	3	0	-3
14.516.5	Female	2016-06-01	Two	First	No	46	JF	283.816	292.399	23.685	599.9	6	10	410	1.66667	68.3333	3	94	NA	6	NA	86	CB	278.524	292.385	29.019	599.928	8	15	570	1.875	71.25	2	-5.292	-0.014	5.334	5	160	0.208333	2.91667	2	-1	11	5	-2	-13	10	3	-7
14.731.7	Male	2016-05-27	Two	First	No	49	CB	328.776	259.135	11.99	599.901	4	5	190	1.25	47.5	5	31	NA	0	NA	40	JF	348.672	246.842	4.365	599.879	3	3	90	1	30	5	19.896	-12.293	-7.625	-2	-100	-0.25	-17.5	-1	0	40	40	33	-7	2	0	-2
14.732.10	Female	2016-05-31	Two	First	No	2	JF	285.287	290.997	23.128	599.412	4	5	220	1.25	55	0	34	NA	0	NA	90	CB	326.814	237.628	35.205	599.647	8	9	390	1.125	48.75	11	41.527	-53.369	12.077	4	170	-0.125	-6.25	4	11	29	13	40	11	6	5	-1
14.732.18	Female	2016-05-31	Two	First	No	79	CB	287.454	292.12	20.342	599.916	7	15	570	2.14286	81.4286	4	54	NA	5	NA	84	CB	394.673	186.789	18.438	599.9	6	18	690	3	115	2	107.219	-105.331	-1.904	3	120	0.857143	33.5714	-1	-2	31	40	40	9	2	5	3
14.732.8	Male	2016-05-31	Two	First	No	11	JF	329.279	252.999	17.633	599.911	5	8	310	1.6	62	6	5	NA	1	NA	89	CB	222.73	372.497	4.639	599.866	4	5	160	1.25	40	11	-106.549	119.498	-12.994	-3	-150	-0.35	-22	-1	5	40	40	39	-1	4	3	-1
14.161.12	Male	2016-05-19	One	Second	No	77	CB	278.519	291.984	29.426	599.929	6	8	310	1.33333	51.6667	8	88	NA	4	NA	6	JF	376.792	203.635	19.489	599.916	5	10	410	2	82	0	98.273	-88.349	-9.937	2	100	0.666667	30.3333	-1	-8	5	7	9	4	0	2	2
14.256.10	Male	2016-05-19	One	Second	No	43	JF	257.923	330.746	11.252	599.921	4	3	120	1	30	2	12	NA	2	NA	27	JF	389.619	210.317	0	599.936	0	0	0	0	0	0	131.696	-120.429	-11.252	-3	-120	-1	-30	-4	-2	1	3	39	38	0	4	4
14.256.7	Male	2016-05-19	One	Second	No	52	CB	257.75	340.036	2.129	599.915	2	2	40	1	20	1	57	NA	0	NA	56	JF	304.938	289.039	5.941	599.918	4	4	110	1	27.5	2	47.188	-50.997	3.812	2	70	0	7.5	2	1	40	34	10	-30	1	0	-1
14.413.8	Female	2016-05-25	One	Second	No	51	CB	261.651	284.055	54.181	599.887	10	18	780	1.8	78	2	48	NA	2	NA	1	JF	335.798	241.114	22.979	599.891	9	17	670	1.88889	74.4444	3	74.147	-42.941	-31.202	-1	-110	0.0888889	-3.55556	-1	1	5	2	16	11	3	8	5
14.415.7	Female	2016-05-25	One	Second	No	69	CB	296.842	293.282	9.771	599.895	2	3	120	1.5	60	5	47	NA	4	NA	18	JF	222.234	342.411	35.206	599.851	19	28	1130	1.47368	59.4737	3	-74.608	49.129	25.435	25	1010	-0.0263158	-0.526316	17	-2	16	25	27	11	5	0	-5
14.421.4	Female	2016-05-19	One	Second	No	38	JF	201.094	381.54	17.288	599.922	3	6	300	2	100	0	93	NA	3	NA	83	CB	315.532	270.715	12.838	599.085	3	5	160	1.66667	53.3333	1	114.438	-110.825	-4.45	-1	-140	-0.333333	-46.6667	0	1	8	35	42	34	2	2	0
14.731.8	Female	2016-05-19	One	Second	No	25	JF	264.333	301.797	33.764	599.894	11	15	540	1.66667	49.0909	7	20	NA	6	NA	70	CB	326.448	236.259	37.168	599.875	9	25	1040	2.77778	115.556	4	62.115	-65.538	3.404	10	500	1.11111	66.4646	-2	-3	40	40	40	0	0	1	1
14.732.16	Female	2016-05-25	One	Second	No	7	JF	296.084	269.276	34.284	599.644	5	8	280	1.6	56	2	68	NA	5	NA	26	JF	329.457	260.572	9.526	599.555	6	8	310	1.33333	51.6667	0	33.373	-8.704	-24.758	0	30	-0.266667	-4.33333	1	-2	13	21	12	-1	3	2	-1
												4.90625	5.5															6.09375															22.3438	18.8438	23.0625
						VidTre	ObsTre	TimCorTre	TimMidTre	TimTubTre	TimTotTre	EntTubTre	DisTubTre		DisEntTre		InsTubTre
						3	JF	48.692	113.344	137.949	299.985	4	4		1.33333		1
						4	JF
[truncated: 3 more columns]
